# Supplementary material
Source: PubMed Central journal article supplement (PMC6625761)
Supplement: NIHMS1030299-supplement-Table_S3.pdf [file NIHMS1030299-supplement-Table_S3.pdf]

**Table S3. Lifestyle Interventional Effect: Meta-analyses Results in A Single Arm Model**

|         | FPG (mmol/L)             |                            |                       | HbA1c (%)                |                            |                       | % change in fasting insulin |                            |                       | % change in HOMA-IR      |                            |                       | Weight loss (%)          |                            |                       |
|---------|--------------------------|----------------------------|-----------------------|--------------------------|----------------------------|-----------------------|-----------------------------|----------------------------|-----------------------|--------------------------|----------------------------|-----------------------|--------------------------|----------------------------|-----------------------|
|         | Study arms (sample size) | Pooled effect mean (95%CI) | Heterogeneity p value | Study arms (sample size) | Pooled effect mean (95%CI) | Heterogeneity p value | Study arms (sample size)    | Pooled effect mean (95%CI) | Heterogeneity p value | Study arms (sample size) | Pooled effect mean (95%CI) | Heterogeneity p value | Study arms (sample size) | Pooled effect mean (95%CI) | Heterogeneity p value |
| VLCD    | 2 (54)                   | -0.31 (-0.66, 0.04)        | 0.5                   | NA                       |                            |                       | NA                          |                            |                       | NA                       |                            |                       | 2 (40)                   | -13.39 (-16.59, -10.20)    | 0.8                   |
| LCD     | 30 (1105)                | -0.17 (-0.26, -0.08)       | <0.01                 | NA                       |                            |                       | 23 (797)                    | -27.41 (-35.34, -19.48)    | <0.01                 | 6 (179)                  | -23.53 (-40.43, -6.63)     | <0.01                 | 26 (909)                 | -7.15 (-8.14, -6.16)       | <0.01                 |
| LCD+ PA | 9 (374)                  | -0.15 (-0.29, -0.01)       | <0.01                 | NA                       |                            |                       | 4 (134)                     | -27.94 (-36.76, -19.12)    | <0.01                 | NA                       |                            |                       | 9 (374)                  | -4.90 (-8.85, -0.94)       | <0.01                 |
| PA      | 12 (601)                 | -0.03 (-0.12, 0.06)        | <0.01                 | 2 (171)                  | -0.05 (-0.09, -0.01)       | 0.5                   | 9 (491)                     | 2.43 (-4.90, 9.77)         | <0.01                 | 6 (459)                  | 1.08 (-5.74, 7.91)         | <0.01                 | 10 (429)                 | -2.99 (-4.79, -1.19)       | 0.6                   |

Abbreviations: CI: confidence interval; FPG: fasting plasma glucose; HbA1c: glycated hemoglobin A1c; HOMA-IR: homeostasis model assessment of insulin resistance; LCD: low calorie diet; NA: not applicable; PA: physical activity; VLCD: very low calorie
